# Supplementary material
Source: PubMed Central journal article supplement (PMC3223268)
Supplement: NIHMS320384-supplement-01.pdf [file NIHMS320384-supplement-01.pdf]

Table S1 – Values selected by VelvetOptimiser for each assembly

| Sample | K size | Coverage cutoff |
|--------|--------|-----------------|
| L1_s1  | 35     | 4.975670515     |
| L2_s1  | 35     | 1.043965089     |
| L3_s1  | 37     | 2.266179302     |
| N1_s1  | 35     | 1.266947923     |
| N1_s2  | 37     | 1.043965089     |
| N1_s3  | 39     | 1.043965089     |
| N1_s4  | 41     | 2.832724128     |
| N1_s5  | 43     | 3.934348213     |
| N2_s1  | 33     | 1.266947923     |
| N2_s2  | 35     | 1.266947923     |
| N2_s3  | 37     | 1.043965089     |
| N2_s4  | 39     | 1.043965089     |
| N2_s5  | 39     | 1.043965089     |
